# Supplementary material
Source: publisher figshare collection journal article supplement (https://f1000.figshare.com/ndownloader/files/1134493)
Supplement: Supplementary file 1 [file 1134493]

Replicates	mRNA	KTZ 50 uM	KTZ 10 uM	KTZ 1 uM
1	CYP3A51	13.4	2.29	9.01
2	CYP3A51	8.51	1.43	8.37
3	CYP3A51	10.2	2.74	12.4
4	CYP3A51	3.70	1.26	8.88
5	CYP3A51	10.6	1.15	9.15
6	CYP3A51	7.90	2.03	13.1
1	B2M	4.57E+03	1.13E+03	1.73E+03
2	B2M	2.72E+03	9.96E+02	1.58E+03
3	B2M	3.39E+03	1.15E+03	2.52E+03
4	B2M	4.63E+02	6.42E+02	1.67E+03
5	B2M	1.73E+03	7.36E+02	1.84E+03
6	B2M	1.60E+03	9.78E+02	3.39E+03
